# Supplementary material
Source: publisher figshare collection journal article supplement (https://tandf.figshare.com/ndownloader/files/22817654)
Supplement: Supplementary file 1 [file 22817654]

## Appendix A – Role of Negative Emissions Technologies

Virtually all of the 2°C scenarios within the IPCC’s database include negative emissions technologies removing several hundred billion tonnes of carbon dioxide directly from the atmosphere across, and beyond, the century (Anderson, 2015). However, there is wide recognition that the efficacy and global rollout of such technologies are highly speculative, with a non-trivial risk of failing to deliver at, or even approaching, the scales typically assumed in the models.

Whilst the authors of this paper are supportive of funding further research, development and, potentially, deployment of NETs, the assumption that they will significantly extend the carbon budgets is a serious moral hazard (Anderson & Peters, 2016). Ultimately, if there is genuine action to mitigate emissions in line with a “likely” chance of staying below 2°C, and NETs do prove to be a viable and scalable option, then, in theory at least, an opportunity arises for holding the temperature rise to 1.5°C. By contrast, if action to mitigate for 2°C is undermined by the prospect of NETs, and such technologies subsequently prove not to be scalable, then we will have bequeathed a 3°C, 4°C or higher legacy. As is clear from the 2°C scenarios submitted to the IPCC, the inclusion of carbon capture and storage (CCS) and biomass energy with carbon capture and storage (BECCS) include considerably more fossil fuel combustion than those without them (Figure 1). It is evident, that mitigation advice to government is already being influenced by assumptions about NETs, and indeed the rapid uptake of CCS, neither of which shows any sign of approaching the scales of rollout in the models.

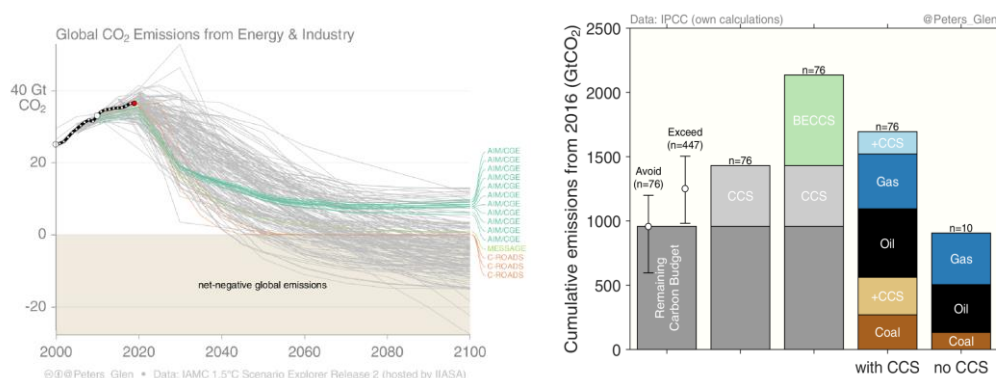

Figure 1 Emissions pathways based on the IPCC SR15 scenarios database, a) illustrate the extent of net-negative global emissions and very small number without CCS deployment (coloured lines) and b) how the inclusion of CCS and BECCS result in much more fossil fuel use (Reproduced from Peters & Sognnaes, 2019 CC-BY-NC-ND-4.0)

The coming together of the IPCC’s carbon budgets with the Paris temperature commitments has catalysed considerable activity within the mitigation community. This is exemplified in Rockström et al. (2017) where they capture the spirit of the time in coining the “carbon law” as a heuristic guide to mitigation policy. However, they also embrace highly speculative BECCS, to extract many hundreds of billions of tonnes of carbon dioxide directly from the atmosphere across and beyond the 21<sup>st</sup> century. According to their analysis, untested BECCS is set to deliver the equivalent of 40-60% of today’s total global energy use and a rate of removal of CO<sub>2</sub> greater than that currently absorbed by all the world’s oceans.

Reliance on future technical options could provide interesting outliers to suites of more grounded mitigation scenarios. Instead, invoking BECCS (the NET of choice in virtually all models) as a technique for expanding the available carbon budget is ubiquitous across the IPCC’s range of 2°C scenarios. This preference for future and highly speculative technologies over actual mitigation today emerges from the economic core of the ‘integrated assessment models’ (IAMs) that dominate the IPCC’s mitigation work. By applying even a small discount rate, the

hypothetical costs of speculative technologies in the distant future consistently undercuts the real costs of meaningful mitigation today. Consequently, these models typically tune their outputs, implicitly, towards narratives that avoid mitigation not amenable to a technical fix.

Across the IAM scenarios this systemic preference for future and highly *uncertain* negative emissions extending carbon budgets is in contrast to the exclusion of those similarly *uncertain* positive carbon cycle feedbacks anticipated to reduce the available carbon budgets. Moving away from heavily discounted technical scenarios reliant on speculative technologies, opens up space to consider alternative routes for delivering rapid and deep mitigation. Such scenarios align more with the broad church of contextual political economy and even moral philosophy than the highly mathematical and non-contextual economics that dominates the IAMs.

Certainly, prolonged mitigation rates of over 10% per year will demand levels of political, social and technical innovation with few historical precedents (Hickel & Kallis, 2019). Nevertheless, if the Paris 2°C commitment is to transcend the rarefied world frequented by non-contextual economists and technophiles, it is such scales of whole-system innovation that is now called for.

## References

Anderson, K., 2015, Duality in Climate Science, *Nature Geoscience*, 8, 898-900, doi:10.1038/ngeo2559

Anderson, K. & Peters, G. (2016). The trouble with negative emissions. *Science*, 354(6309), 182-183.

Hickel, J. & Kallis, G. (2019). Is Green Growth Possible?, *New Political Economy*. doi: 10.1080/13563467.2019.1598964

Peters, G. & Sognnaes, I. (2019). The Role of Carbon Capture and Storage in the Mitigation of Climate Change. REPORT 2019:21, CICERO, Oslo. Retrieved from: <http://hdl.handle.net/11250/2633470>

Rockström, J., Gaffney, O., Rogelj, J., Meinshausen, M., Nakicenovic, N. & Schellnhuber, H. J. (2017). A roadmap for rapid decarbonization. *Science*, 355(6331), 1269-1271.

## Appendix B – Cement

The difference in the cement intensity between societies with widespread and “mature” infrastructure and those rapidly constructing such infrastructure is evident when comparing, for example, the EU with China. For 2017, the former consumed around 330kg/capita of cement, with official estimates for the latter being over five times higher at nearer 1670kg/capita. Much higher figures still were evident during the boom years of some Middle East countries (Davidson, 2014), but other rapidly industrialising nations have had more moderate cement use with South Korea around 1010kg/capita, Vietnam 825kg/capita, and Malaysia 595kg/capita in 2017 (US Geological Survey 2019, World Bank 2019).

At a global level, the volume of concrete use exceeds that of all other manufactured material, with the production of cement, a key ingredient, reaching 4.1 billion tonnes in 2017 (US Geological Survey, 2019). This production emitted around 8% of global carbon dioxide emissions, arising from both energy use and chemical processes (Lehne & Preston, 2018). In 2017 cement process emissions were 1.48 GtCO<sub>2</sub> (Global Carbon Atlas, 2019), the equivalent of 4.3% of all emissions from direct global energy use. Even within the very conservative growth rates assumed in the International Energy Agency’s (IEA) Cement Technology Roadmap vision aligned with their 2 degree Celsius scenario (2DS), cement production is set to continue to rise, reaching around 4.7 billion tonnes by 2050 (Table 2, IEA, 2018). This modest increase of 15% over 23 years equates to an annual average growth of around 0.4%, which is an order of magnitude lower than anything witnessed since the 1950s. Between 1950 and 2000, global cement production grew at 5.5% p.a., holding steady from 2000 to 2018 at 5.1%. Only since 2010 has any real period of reduced growth occurred, and even here it has still averaged 3.4% p.a. (US Geological Survey, 2014).

The IEA’s 2DS scenario (IEA, 2018) is dependent on a major break from the historical precedent of cement as the core manufactured material in the industrialisation of rapidly ‘developing’ nations. Despite this, the scenario pushes technologies toward their currently understood limit, with process emissions remaining the stubborn residue. The assumption adopted here is that between 2050 and 2075 process emissions will be eliminated. This could come about through a combination of factors: from substitute feedstocks that eliminate process emissions and reductions in demand for cement as global infrastructure development matures, through to alternatives to cement becoming available, or carbon capture and storage (CCS) technologies deployed to remove process emissions at source.

Applying CCS to the rich CO<sub>2</sub> stream from cement manufacture is a much simpler, cheaper and more efficient proposition than capturing CO<sub>2</sub> from fossil fuel plants, where separation of CO<sub>2</sub> from nitrogen in the flue gases along with upstream emissions of fuel extraction still impose a significant emissions burden, anticipated to be 100-200 gCO<sub>2</sub>/kWh (Gibson, T. et al., 2017). For cement, capturing process CO<sub>2</sub> requires little more than separating the calcination of the limestone from the products of combustion providing the heat (~900 °C) for the calcination to occur. At the time of writing, a pilot plant designed to do exactly this is nearing completion in Belgium, and in terms of separation involves little more than an annular heat exchanger (Hills, T. et al., 2017).

Figure 1 is a modified version of the IEA 2DS scenario, with the process emissions eliminated by 2075.

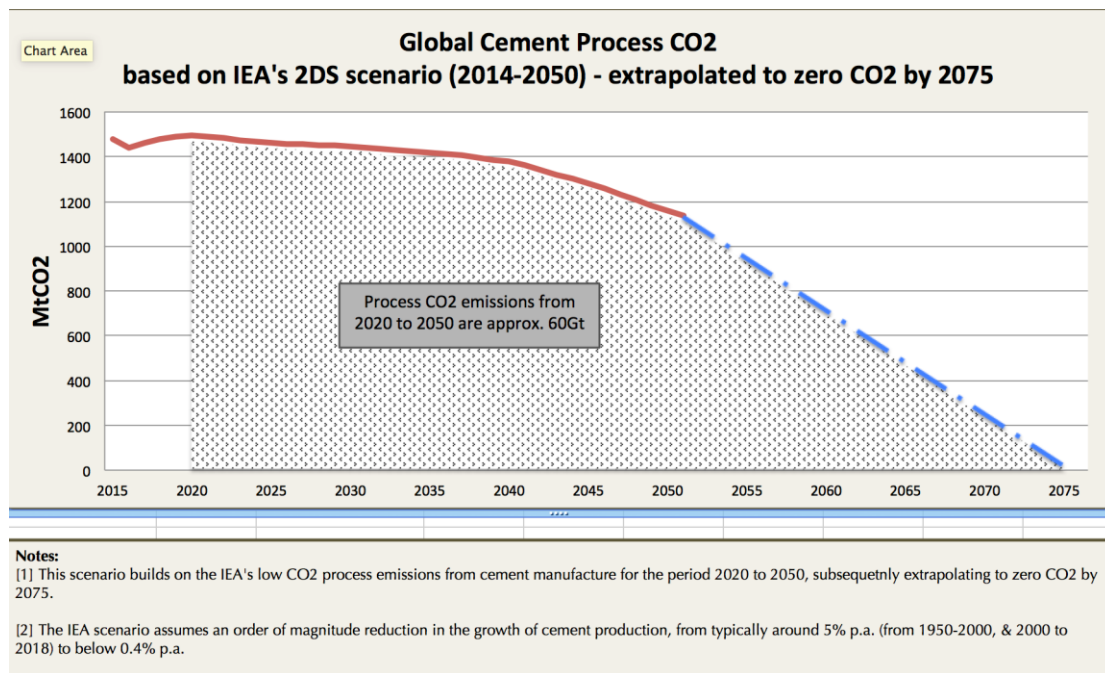

Figure 1 Global cement process carbon dioxide scenario

## References

- Davidson, E. (2014). Defining the trend: Cement consumption versus Gross Domestic Product. *Global Cement: Trends 2014*. P.10. Retrieved from: <http://www.globalcement.com/images/stories/documents/articles/eGC-June2014-8-12.pdf>
- Gibon, T. et al. (2017). Life cycle assessment demonstrates environmental co-benefits and trade-offs of low-carbon electricity supply options. *Renewable and Sustainable Energy Reviews* 76, pp1283-1290.
- Global Carbon Atlas. (2019). Cement data updated from Andrew, R., 2018. Global CO2 emissions from cement production. *Earth System Science Data*, 10, 195-217. DOI: 10.5194/essd-10-195-2018.
- Hills, T. et al. (2017). LEILAC: Low Cost CO2 Capture for the Cement and Lime Industries. *Energy Procedia*. 114. 6166-6170.
- International Energy Agency. (2018) Technology Roadmap Low-Carbon Transition in the Cement Industry, Paris, France. Retrieved from: <https://webstore.iea.org/technology-roadmap-low-carbon-transition-in-the-cement-industry>
- Lehne, J. and Preston, F. (2018). Making Concrete Change: Innovation in Low-carbon Cement and Concrete. Chatham House Report. June 2018. p.V
- U.S. Geological Survey. (2014). Historical Statistics for Mineral and Material Commodities. Updated with the latest annual data for 2015-18 from the same source. Retrieved from <https://minerals.usgs.gov/minerals/pubs/historical-statistics/>
- U.S. Geological Survey. (2019). Mineral commodity summaries 2019: U.S. Geological Survey, 200 p.43, DOI: [10.3133/70202434](https://doi.org/10.3133/70202434)
- World Bank (2017) Population data: Retrieved from: <https://data.worldbank.org/indicator/sp.pop.totl>

## Appendix C – Country Grouping

In the first pair of adjusted classifications, the ‘developing’ nations group (hereafter referred to as DG1) comprises the ‘G77 and China’ as well as all other non-Annex 1 nations with the exception of South Korea, Israel, Andorra and San Marino, all of whom have a Human Development Index (HDI) and a GDP per capita (PPP basis) very close to or above the Annex 1 mean. Ukraine is moved from its usual Annex 1 classification into DG1 as its HDI and PPP per capita are well below all other Annex 1 countries, and indeed well below many non-Annex 1 nations. This still leaves unclassified the eighteen nations not party to the UNFCCC. For completeness and based on a combined weighting of their HDI and PPP, nine of these are allocated to DG1 with the remaining nine to the ‘developed’ nations group (henceforth DD1). Between the eighteen nations not party to the UNFCCC, the emissions of Taiwan and Hong Kong dominate, and with both having high HDI and PPP values, are subsequently included within the DD1 grouping.

The second pair of classifications (DG2 and DD2) is identical to DG1 and DD1, but with one important distinction. The G77 grouping includes seven wealthy Middle East nations and Singapore, all with very high PPP values and relatively high HDIs. In the DG2/DD2 classification these countries are classified as ‘developed country Parties’ (i.e. belonging to DD2).

Table 1 lists all countries of the world that have carbon emissions data available (based on the Global Carbon Project, 2018) as well as their classification as either developed (DD) or developing (DG) country Parties. There are eight countries that are classified as developing in the first pair of adjusted classifications and developed in the second, hence belonging to DG1 as well as DD2. The adjusted classifications mirror UNFCCC protocol, with the exception of those few countries whose GDP per capita (PPP basis), as the principal indicator, and level of development (as measured in HDI), as a secondary indicator, merit their re-classification. Classifications based on UNFCCC terminology (Annex-1 & Non-Annex 1; G77+China; and LDC) are also listed in Table 1, as are each country’s GDP per Capita (PPP basis) and HDI.

Table 1: Country classifications as developing (DG) and developed (DD) country Parties.

|                               | Developing<br>or<br>Developed | UNFCCC<br>classification | G77+<br>China | LDC | GDP per<br>capita 2017,<br>PPP (current<br>international<br>\$) | Source if<br>not World<br>Bank<br>(2019) | HDI<br>2017 | Source if<br>not<br>UNDP<br>(2019) |
|-------------------------------|-------------------------------|--------------------------|---------------|-----|-----------------------------------------------------------------|------------------------------------------|-------------|------------------------------------|
| <b>Belarus</b>                | DD                            | Annex 1                  |               |     | 18837                                                           |                                          | 0,808       |                                    |
| <b>Bulgaria</b>               | DD                            | Annex 1                  |               |     | 20948                                                           |                                          | 0,813       |                                    |
| <b>Russian<br/>Federation</b> | DD                            | Annex 1                  |               |     | 25533                                                           |                                          | 0,816       |                                    |
| <b>Croatia</b>                | DD                            | Annex 1                  |               |     | 26288                                                           |                                          | 0,831       |                                    |
| <b>Turkey</b>                 | DD                            | Annex 1                  |               |     | 26519                                                           |                                          | 0,791       |                                    |
| <b>Romania</b>                | DD                            | Annex 1                  |               |     | 26657                                                           |                                          | 0,811       |                                    |
| <b>Greece</b>                 | DD                            | Annex 1                  |               |     | 27602                                                           |                                          | 0,87        |                                    |
| <b>Hungary</b>                | DD                            | Annex 1                  |               |     | 28108                                                           |                                          | 0,838       |                                    |
| <b>Latvia</b>                 | DD                            | Annex 1                  |               |     | 28199                                                           |                                          | 0,847       |                                    |
| <b>Poland</b>                 | DD                            | Annex 1                  |               |     | 29122                                                           |                                          | 0,865       |                                    |
| <b>Slovak Republic</b>        | DD                            | Annex 1                  |               |     | 31616                                                           |                                          | 0,855       |                                    |

|                          |    |             |     |     |        |                |       |    |
|--------------------------|----|-------------|-----|-----|--------|----------------|-------|----|
| Portugal                 | DD | Annex 1     |     |     | 31673  |                | 0,847 |    |
| Estonia                  | DD | Annex 1     |     |     | 31742  |                | 0,871 |    |
| Lithuania                | DD | Annex 1     |     |     | 32998  |                | 0,858 |    |
| Cyprus                   | DD | Annex 1     |     |     | 34503  |                | 0,869 |    |
| Slovenia                 | DD | Annex 1     |     |     | 34868  |                | 0,896 |    |
| Czech Republic           | DD | Annex 1     |     |     | 36327  |                | 0,888 |    |
| Spain                    | DD | Annex 1     |     |     | 37998  |                | 0,891 |    |
| Israel                   | DD | Non-Annex 1 |     |     | 38262  |                | 0,903 |    |
| Korea, Rep.              | DD | Non-Annex 1 |     |     | 38335  |                | 0,903 |    |
| Italy                    | DD | Annex 1     |     |     | 39427  |                | 0,88  |    |
| Malta                    | DD | Annex 1     |     |     | 41034  |                | 0,878 |    |
| New Zealand              | DD | Annex 1     |     |     | 41109  |                | 0,917 |    |
| France                   | DD | Annex 1     |     |     | 42850  |                | 0,901 |    |
| United Kingdom           | DD | Annex 1     |     |     | 43269  |                | 0,922 |    |
| Japan                    | DD | Annex 1     |     |     | 43279  |                | 0,909 |    |
| Finland                  | DD | Annex 1     |     |     | 44866  |                | 0,92  |    |
| Canada                   | DD | Annex 1     |     |     | 46705  |                | 0,926 |    |
| Belgium                  | DD | Annex 1     |     |     | 47840  |                | 0,916 |    |
| Australia                | DD | Annex 1     |     |     | 48460  |                | 0,939 |    |
| Sweden                   | DD | Annex 1     |     |     | 50208  |                | 0,933 |    |
| Germany                  | DD | Annex 1     |     |     | 50639  |                | 0,936 |    |
| Denmark                  | DD | Annex 1     |     |     | 51364  |                | 0,929 |    |
| Austria                  | DD | Annex 1     |     |     | 52398  |                | 0,908 |    |
| Netherlands              | DD | Annex 1     |     |     | 52503  |                | 0,931 |    |
| Iceland                  | DD | Annex 1     |     |     | 53153  |                | 0,935 |    |
| Andorra                  | DD | Non-Annex 1 |     |     | 54576  | (1) 2015 value | 0,858 |    |
| United States            | DD | Annex 1     |     |     | 59532  |                | 0,924 |    |
| Norway                   | DD | Annex 1     |     |     | 61414  |                | 0,953 |    |
| San Marino               | DD | Non-Annex 1 |     |     | 63414  |                | 0,961 | 6) |
| Switzerland              | DD | Annex 1     |     |     | 64712  |                | 0,944 |    |
| Ireland                  | DD | Annex 1     |     |     | 75648  |                | 0,938 |    |
| Luxembourg               | DD | Annex 1     |     |     | 103745 |                | 0,904 |    |
| Monaco                   | DD | Annex 1     |     |     | 123579 | (1) 2015 value | 0,956 | 6) |
| Liechtenstein            | DD | Annex 1     |     |     | 189176 | (1) 2009 value | 0,916 |    |
| Somalia                  | DG | Non-Annex 1 | G77 | LDC | 547    | (2) 2010 value | 0,364 | 6) |
| Central African Republic | DG | Non-Annex 1 | G77 | LDC | 726    |                | 0,367 |    |
| Burundi                  | DG | Non-Annex 1 | G77 | LDC | 734    |                | 0,417 |    |
| Congo, Dem. Rep.         | DG | Non-Annex 1 | G77 | LDC | 887    |                | 0,457 |    |
| Niger                    | DG | Non-Annex 1 | G77 | LDC | 1017   |                | 0,354 |    |
| Malawi                   | DG | Non-Annex 1 | G77 | LDC | 1202   |                | 0,477 |    |
| Mozambique               | DG | Non-Annex 1 | G77 | LDC | 1248   |                | 0,437 |    |
| Liberia                  | DG | Non-Annex 1 | G77 | LDC | 1283   |                | 0,435 |    |
| Sierra Leone             | DG | Non-Annex 1 | G77 | LDC | 1527   |                | 0,419 |    |

|                           |    |             |     |     |      |                |       |     |
|---------------------------|----|-------------|-----|-----|------|----------------|-------|-----|
| Madagascar                | DG | Non-Annex 1 | G77 | LDC | 1555 |                | 0,519 |     |
| Eritrea                   | DG | Non-Annex 1 | G77 | LDC | 1585 | (3)            | 0,44  |     |
| South Sudan               | DG | Non-Annex 1 | G77 | LDC | 1590 | (3)            | 0,388 |     |
| Togo                      | DG | Non-Annex 1 | G77 | LDC | 1660 |                | 0,503 |     |
| Gambia, The               | DG | Non-Annex 1 | G77 | LDC | 1696 |                | 0,46  |     |
| Korea, Dem. People's Rep. | DG | Non-Annex 1 | G77 |     | 1700 | (1) 2015 value | 0,733 | (6) |
| Guinea-Bissau             | DG | Non-Annex 1 | G77 | LDC | 1700 |                | 0,455 |     |
| Haiti                     | DG | Non-Annex 1 | G77 | LDC | 1815 |                | 0,498 |     |
| Burkina Faso              | DG | Non-Annex 1 | G77 | LDC | 1862 |                | 0,423 |     |
| Uganda                    | DG | Non-Annex 1 | G77 | LDC | 1864 |                | 0,516 |     |
| Ethiopia                  | DG | Non-Annex 1 | G77 | LDC | 1899 |                | 0,463 |     |
| Chad                      | DG | Non-Annex 1 | G77 | LDC | 1941 |                | 0,404 |     |
| Afghanistan               | DG | Non-Annex 1 | G77 | LDC | 1972 |                | 0,498 |     |
| Rwanda                    | DG | Non-Annex 1 | G77 | LDC | 2039 |                | 0,524 |     |
| Kiribati                  | DG | Non-Annex 1 | G77 | LDC | 2180 |                | 0,612 |     |
| Mali                      | DG | Non-Annex 1 | G77 | LDC | 2214 |                | 0,427 |     |
| Guinea                    | DG | Non-Annex 1 | G77 | LDC | 2242 |                | 0,459 |     |
| Benin                     | DG | Non-Annex 1 | G77 | LDC | 2272 |                | 0,515 |     |
| Solomon Islands           | DG | Non-Annex 1 | G77 | LDC | 2422 |                | 0,546 |     |
| Zimbabwe                  | DG | Non-Annex 1 | G77 |     | 2429 |                | 0,535 |     |
| State of Palestine        | DG | Non-Annex 1 | G77 |     | 2465 | (2) 2005 value | 0,686 |     |
| Yemen, Rep.               | DG | Non-Annex 1 | G77 | LDC | 2601 |                | 0,452 |     |
| Nepal                     | DG | Non-Annex 1 | G77 | LDC | 2697 |                | 0,574 |     |
| Comoros                   | DG | Non-Annex 1 | G77 | LDC | 2745 |                | 0,503 |     |
| Syrian Arab Republic      | DG | Non-Annex 1 | G77 |     | 2900 | (1) 2015 value | 0,536 |     |
| Lesotho                   | DG | Non-Annex 1 | G77 | LDC | 2926 |                | 0,52  |     |
| Tanzania                  | DG | Non-Annex 1 | G77 | LDC | 2946 |                | 0,538 |     |
| Tajikistan                | DG | Non-Annex 1 | G77 |     | 3195 |                | 0,65  |     |
| Vanuatu                   | DG | Non-Annex 1 | G77 | LDC | 3208 |                | 0,603 |     |
| Kenya                     | DG | Non-Annex 1 | G77 |     | 3285 |                | 0,59  |     |
| Sao Tome and Principe     | DG | Non-Annex 1 | G77 | LDC | 3351 |                | 0,589 |     |
| Senegal                   | DG | Non-Annex 1 | G77 | LDC | 3450 |                | 0,505 |     |
| Djibouti                  | DG | Non-Annex 1 | G77 | LDC | 3567 | (3)            | 0,476 |     |
| Micronesia, Fed. Sts.     | DG | Non-Annex 1 | G77 |     | 3693 |                | 0,627 |     |
| Cameroon                  | DG | Non-Annex 1 | G77 |     | 3715 |                | 0,556 |     |
| Kyrgyz Republic           | DG | Non-Annex 1 |     |     | 3726 |                | 0,672 |     |
| Bangladesh                | DG | Non-Annex 1 | G77 | LDC | 3869 |                | 0,608 |     |
| Tuvalu                    | DG | Non-Annex 1 |     | LDC | 3925 |                | 0,711 | (6) |
| Cote d'Ivoire             | DG | Non-Annex 1 | G77 |     | 3936 |                | 0,492 |     |
| Mauritania                | DG | Non-Annex 1 | G77 | LDC | 3950 |                | 0,52  |     |
| Cambodia                  | DG | Non-Annex 1 | G77 | LDC | 4009 |                | 0,582 |     |
| Zambia                    | DG | Non-Annex 1 | G77 | LDC | 4024 |                | 0,588 |     |

|                              |    |             |     |     |       |                |       |     |
|------------------------------|----|-------------|-----|-----|-------|----------------|-------|-----|
| Papua New Guinea             | DG | Non-Annex 1 | G77 |     | 4199  |                | 0,544 |     |
| Marshall Islands             | DG | Non-Annex 1 | G77 |     | 4238  |                | 0,708 |     |
| Ghana                        | DG | Non-Annex 1 | G77 |     | 4492  |                | 0,592 |     |
| Sudan                        | DG | Non-Annex 1 | G77 | LDC | 4904  |                | 0,502 |     |
| Honduras                     | DG | Non-Annex 1 | G77 |     | 4986  |                | 0,617 |     |
| Congo, Rep.                  | DG | Non-Annex 1 | G77 |     | 5443  |                | 0,606 |     |
| Pakistan                     | DG | Non-Annex 1 | G77 |     | 5527  |                | 0,562 |     |
| Moldova                      | DG | Non-Annex 1 |     |     | 5698  |                | 0,7   |     |
| Nieu                         | DG | Non-Annex 1 |     |     | 5800  | (4) 2004 value | 0,794 | (6) |
| Nicaragua                    | DG | Non-Annex 1 | G77 |     | 5842  |                | 0,658 |     |
| Nigeria                      | DG | Non-Annex 1 | G77 |     | 5875  |                | 0,532 |     |
| Tonga                        | DG | Non-Annex 1 | G77 |     | 5957  |                | 0,726 |     |
| Myanmar                      | DG | Non-Annex 1 | G77 | LDC | 6161  |                | 0,578 |     |
| Samoa                        | DG | Non-Annex 1 | G77 |     | 6627  |                | 0,713 |     |
| Angola                       | DG | Non-Annex 1 | G77 | LDC | 6644  |                | 0,581 |     |
| Vietnam                      | DG | Non-Annex 1 | G77 |     | 6776  |                | 0,694 |     |
| Uzbekistan                   | DG | Non-Annex 1 |     |     | 6865  |                | 0,71  |     |
| Cabo Verde                   | DG | Non-Annex 1 | G77 |     | 6898  |                | 0,654 |     |
| Lao PDR                      | DG | Non-Annex 1 | G77 | LDC | 7023  |                | 0,601 |     |
| India                        | DG | Non-Annex 1 | G77 |     | 7059  |                | 0,64  |     |
| Timor-Leste                  | DG | Non-Annex 1 | G77 | LDC | 7213  |                | 0,625 |     |
| Bolivia                      | DG | Non-Annex 1 | G77 |     | 7560  |                | 0,693 |     |
| El Salvador                  | DG | Non-Annex 1 | G77 |     | 8006  |                | 0,674 |     |
| Guatemala                    | DG | Non-Annex 1 | G77 |     | 8150  |                | 0,65  |     |
| Guyana                       | DG | Non-Annex 1 | G77 |     | 8163  |                | 0,654 |     |
| Morocco                      | DG | Non-Annex 1 | G77 |     | 8217  |                | 0,667 |     |
| Philippines                  | DG | Non-Annex 1 | G77 |     | 8343  |                | 0,699 |     |
| Belize                       | DG | Non-Annex 1 | G77 |     | 8507  |                | 0,708 |     |
| Eswatini                     | DG | Non-Annex 1 | G77 |     | 8641  |                | 0,588 |     |
| Ukraine                      | DG | Annex 1     |     |     | 8667  |                | 0,751 |     |
| Jamaica                      | DG | Non-Annex 1 | G77 |     | 9046  |                | 0,732 |     |
| Jordan                       | DG | Non-Annex 1 | G77 |     | 9153  |                | 0,735 |     |
| Bhutan                       | DG | Non-Annex 1 | G77 | LDC | 9372  |                | 0,612 |     |
| Fiji                         | DG | Non-Annex 1 | G77 |     | 9555  |                | 0,741 |     |
| Armenia                      | DG | Non-Annex 1 |     |     | 9647  |                | 0,755 |     |
| Dominica                     | DG | Non-Annex 1 | G77 |     | 10016 |                | 0,715 |     |
| Namibia                      | DG | Non-Annex 1 | G77 |     | 10449 |                | 0,647 |     |
| Georgia                      | DG | Non-Annex 1 |     |     | 10683 |                | 0,78  |     |
| Egypt, Arab Rep.             | DG | Non-Annex 1 | G77 |     | 11584 |                | 0,696 |     |
| Ecuador                      | DG | Non-Annex 1 | G77 |     | 11587 |                | 0,752 |     |
| St. Vincent & the Grenadines | DG | Non-Annex 1 | G77 |     | 11744 |                | 0,723 |     |
| Tunisia                      | DG | Non-Annex 1 | G77 |     | 11911 |                | 0,735 |     |
| Indonesia                    | DG | Non-Annex 1 | G77 |     | 12284 |                | 0,694 |     |



|                        |    |             |     |  |       |                |       |     |
|------------------------|----|-------------|-----|--|-------|----------------|-------|-----|
| Venezuela, RB          | DG | Non-Annex 1 | G77 |  | 12514 | (3)            | 0,761 |     |
| Sri Lanka              | DG | Non-Annex 1 | G77 |  | 12835 |                | 0,77  |     |
| Mongolia               | DG | Non-Annex 1 | G77 |  | 12918 |                | 0,741 |     |
| Albania                | DG | Non-Annex 1 |     |  | 12943 |                | 0,785 |     |
| Cuba                   | DG | Non-Annex 1 | G77 |  | 13028 | (1) 2016 value | 0,777 |     |
| Paraguay               | DG | Non-Annex 1 | G77 |  | 13082 |                | 0,702 |     |
| Bosnia and Herzegovina | DG | Non-Annex 1 | G77 |  | 13108 |                | 0,768 |     |
| Peru                   | DG | Non-Annex 1 | G77 |  | 13434 |                | 0,75  |     |
| South Africa           | DG | Non-Annex 1 | G77 |  | 13498 |                | 0,699 |     |
| St. Lucia              | DG | Non-Annex 1 | G77 |  | 13956 |                | 0,747 |     |
| Nauru                  | DG | Non-Annex 1 | G77 |  | 14158 |                | 0,721 | (6) |
| Colombia               | DG | Non-Annex 1 | G77 |  | 14473 |                | 0,747 |     |
| Lebanon                | DG | Non-Annex 1 | G77 |  | 14482 |                | 0,757 |     |
| Palau                  | DG | Non-Annex 1 |     |  | 14823 |                | 0,798 |     |
| Grenada                | DG | Non-Annex 1 | G77 |  | 15124 |                | 0,772 |     |
| Suriname               | DG | Non-Annex 1 | G77 |  | 15159 |                | 0,72  |     |
| Algeria                | DG | Non-Annex 1 | G77 |  | 15260 |                | 0,754 |     |
| Macedonia, FYR         | DG | Non-Annex 1 |     |  | 15290 |                | 0,757 |     |
| Serbia                 | DG | Non-Annex 1 |     |  | 15429 |                | 0,787 |     |
| Brazil                 | DG | Non-Annex 1 | G77 |  | 15484 |                | 0,759 |     |
| Dominican Republic     | DG | Non-Annex 1 | G77 |  | 16030 |                | 0,736 |     |
| Maldives               | DG | Non-Annex 1 | G77 |  | 16653 |                | 0,717 |     |
| Cook Islands           | DG | Non-Annex 1 |     |  | 16700 | (1) 2016 value | 0,829 | (6) |
| China                  | DG | Non-Annex 1 | G77 |  | 16807 |                | 0,752 |     |
| Iraq                   | DG | Non-Annex 1 | G77 |  | 16899 |                | 0,685 |     |
| Botswana               | DG | Non-Annex 1 | G77 |  | 16988 |                | 0,717 |     |
| Costa Rica             | DG | Non-Annex 1 | G77 |  | 17074 |                | 0,794 |     |
| Azerbaijan             | DG | Non-Annex 1 |     |  | 17398 |                | 0,757 |     |
| Thailand               | DG | Non-Annex 1 | G77 |  | 17872 |                | 0,755 |     |
| Turkmenistan           | DG | Non-Annex 1 | G77 |  | 17993 |                | 0,706 |     |
| Gabon                  | DG | Non-Annex 1 | G77 |  | 18075 |                | 0,702 |     |
| Mexico                 | DG | Non-Annex 1 |     |  | 18273 |                | 0,774 |     |
| Barbados               | DG | Non-Annex 1 | G77 |  | 18520 |                | 0,8   |     |
| Montenegro             | DG | Non-Annex 1 |     |  | 19352 |                | 0,814 |     |
| Libya                  | DG | Non-Annex 1 | G77 |  | 19631 |                | 0,706 |     |
| Argentina              | DG | Non-Annex 1 | G77 |  | 20785 |                | 0,825 |     |
| Iran, Islamic Rep.     | DG | Non-Annex 1 | G77 |  | 20841 |                | 0,798 |     |
| Mauritius              | DG | Non-Annex 1 | G77 |  | 22309 |                | 0,79  |     |
| Uruguay                | DG | Non-Annex 1 | G77 |  | 22562 |                | 0,804 |     |
| Antigua and Barbuda    | DG | Non-Annex 1 | G77 |  | 23472 |                | 0,78  |     |
| Equatorial Guinea      | DG | Non-Annex 1 | G77 |  | 24387 |                | 0,591 |     |
| Panama                 | DG | Non-Annex 1 | G77 |  | 24469 |                | 0,789 |     |
| Chile                  | DG | Non-Annex 1 | G77 |  | 24635 |                | 0,843 |     |

|                               |           |             |     |  |        |                |       |            |
|-------------------------------|-----------|-------------|-----|--|--------|----------------|-------|------------|
| Kazakhstan                    | DG        | Non-Annex 1 |     |  | 26435  |                | 0,8   |            |
| St. Kitts and Nevis           | DG        | Non-Annex 1 | G77 |  | 28576  |                | 0,778 |            |
| Seychelles                    | DG        | Non-Annex 1 | G77 |  | 29265  |                | 0,797 |            |
| Malaysia                      | DG        | Non-Annex 1 | G77 |  | 29449  |                | 0,802 |            |
| Bahamas, The                  | DG        | Non-Annex 1 | G77 |  | 30430  |                | 0,807 |            |
| Trinidad and Tobago           | DG        | Non-Annex 1 | G77 |  | 31578  |                | 0,784 |            |
| Oman                          | DG1 & DD2 | Non-Annex 1 | G77 |  | 41675  |                | 0,821 |            |
| Bahrain                       | DG1 & DD2 | Non-Annex 1 | G77 |  | 47527  |                | 0,846 |            |
| Saudi Arabia                  | DG1 & DD2 | Non-Annex 1 | G77 |  | 53779  |                | 0,853 |            |
| Kuwait                        | DG1 & DD2 | Non-Annex 1 | G77 |  | 71943  |                | 0,803 |            |
| United Arab Emirates          | DG1 & DD2 | Non-Annex 1 | G77 |  | 73878  |                | 0,863 |            |
| Brunei Darussalam             | DG1 & DD2 | Non-Annex 1 | G77 |  | 78836  |                | 0,853 |            |
| Singapore                     | DG1 & DD2 | Non-Annex 1 | G77 |  | 93905  |                | 0,932 |            |
| Qatar                         | DG1 & DD2 | Non-Annex 1 | G77 |  | 128374 |                | 0,856 |            |
|                               |           |             |     |  |        |                |       |            |
| Not Parties to UNFCCC         |           |             |     |  |        |                |       |            |
| Wallis and Futuna Islands     | DG        |             |     |  | 5320   | (1) 2004 value | 0,763 | (7)        |
| St. Helena                    | DG        |             |     |  | 8822   | (1) 2009 value | 0,797 | (6)        |
| Anguilla                      | DG        |             |     |  | 13334  | (1) 2008 value | 0,865 | (6)        |
| French Polynesia              | DG        |             |     |  | 18000  | (1) 2015 value | 0,737 | (6)        |
| Bonaire, St. Eustatius & Saba | DG        |             |     |  | 20000  | (5)            | -     | -          |
| Curacao                       | DG        |             |     |  | 20827  | (1) 2004 value | -     | -          |
| New Caledonia                 | DG        |             |     |  | 32063  | (1) 2015 value | 0,789 | (7)        |
| Turks and Caicos Islands      | DG        |             |     |  | 32732  | (1) 2007 value | 0,873 | (6)        |
| British Virgin Islands        | DD        |             |     |  | 34200  | (1)            | 0,945 | (6)        |
| Monsserat                     | DG        |             |     |  | 36696  | (1) 2011 value | 0,821 | (6)        |
| Aruba                         | DD        |             |     |  | 39409  |                | 0,908 | (6)        |
| Faroe Islands                 | DD        |             |     |  | 43434  | (1) 2014 value | 0,95  | (6)        |
| Greenland                     | DD        |             |     |  | 44221  | (1) 2015 value | 0,839 | (8)        |
| Taiwan                        | DD        |             |     |  | 50500  | (1)            | 0,907 | 2017 value |
| Hong Kong SAR, China          | DD        |             |     |  | 61540  |                | 0,933 | 2017 value |
| St. Pierre and Miquelon       | DD        |             |     |  | 61874  | (1) 2006 value | 0,762 | (7)        |
| Bermuda                       | DD        |             |     |  | 102687 | (1) 2016 value | 0,981 | (6)        |
| Macao SAR, China              | DD        |             |     |  | 115123 |                | 0,909 | (9)        |

## 2017 PPP Data

All PPP data from World Bank unless otherwise noted.

World Bank <https://data.worldbank.org/indicator/NY.GDP.PCAP.PP.CD> (Accessed March 10, 2019)

- (1) CIA Factbook, <https://www.cia.gov/library/publications/the-world-factbook/fields/211rank.html>. Accessed March 10, 2019. Estimate based on most recent recorded value and extrapolated to 2017 based on the country's GDP/capita growth (World Bank data).
- (2) Trading economics, <https://tradingeconomics.com>. Accessed June 17, 2019. Estimate based on most recent recorded value and extrapolated to 2017 based on the country's GDP/capita growth (World Bank data).
- (3) IMF, <https://www.imf.org/external/pubs/ft/weo/2018/02/weodata/index.aspx>. Accessed June 17, 2019.
- (4) Index Mundi, <https://www.indexmundi.com>. Accessed June 17, 2019. Estimate based on most recent recorded value and extrapolated to 2017 based on the country's GDP/capita growth (World Bank data).
- (5) BES Reporter <http://bes-reporter.com/index.php/2018/09/19/gdp-up-on-bonaire-down-on-st-eustatius-and-saba-in-2016/>. Accessed March 11, 2019.

## 2017 HDI Data

All HDI data from UNDP unless otherwise noted.

UNDP

[http://hdr.undp.org/sites/default/files/2018\\_human\\_development\\_statistical\\_update.pdf](http://hdr.undp.org/sites/default/files/2018_human_development_statistical_update.pdf). Accessed March 11, 2019.

- (6) UNESCAP <https://www.unescap.org/sites/default/files/wp-09-02.pdf>. Accessed March 11, 2019. Only 2008 data available.
- (7) AFD <https://www.afd.fr/sites/afd/files/imported-files/129-document-travail.pdf>. Accessed March 11, 2019. Only 2010 data available.
- (8) Andersen 2015 [http://econ.au.dk/fileadmin/site\\_files/filer\\_oekonomi/Working\\_Papers/Economics/2015/wp15\\_14.pdf](http://econ.au.dk/fileadmin/site_files/filer_oekonomi/Working_Papers/Economics/2015/wp15_14.pdf). Accessed March 11, 2019. Only 2010 data available.
- (9) DSEC [https://www.dsec.gov.mo/getAttachment/5c26bbdf-77c7-48aa-bb1f-a1537a2b220d/E\\_MN\\_PUB\\_2018\\_Y.aspx](https://www.dsec.gov.mo/getAttachment/5c26bbdf-77c7-48aa-bb1f-a1537a2b220d/E_MN_PUB_2018_Y.aspx). Accessed March 11, 2019. Only 2016 data available.

## Appendix D – Swedish Pathway Details

Emissions covered under the EU Effort Sharing Regulation (ESR) approximate to all territorial emissions except those from energy-intensive industry, power and heat generation, all aviation and international shipping. The sub-goals of the Swedish climate policy framework addressing ESR emissions state that, compared to 1990 levels, territorial greenhouse gas emissions are to be 40% lower in 2020, 63% lower in 2030 and 75% lower in 2040. The climate policy framework further states that national transport emissions (not including domestic aviation) should be 70% lower than 2010 emissions by 2030 which corresponds to 69% lower than 1990 levels.

In their annual report from 2019 the Swedish Climate Policy Council conclude that Sweden's existing policies are failing to deliver the annual mitigation rates aligned with the targets set by the climate policy framework; emission reductions have been under 1% per annum for 2015-2017, rather than the 5-8% required (Klimatpolitiska rådet, 2019). The report further concludes that the annual report on progress by the government only partly fulfils the requirements for reporting, as set out by the climate law.

The current mandate of the Council is to assess whether the government's policies are in line with the Swedish long-term targets, not if these targets in themselves are in line with Paris and the latest scientific understanding of climate change. However, an assessment of the grounds and models on which the government builds its policies on is included in the mandate, opening up potential scope for the council to make a broader and more thorough assessment.

In the aligned pathway presented in the main body of the paper, linear emission pathways between the targets are assumed, following reports by the Swedish Climate Policy Council (Klimatpolitiska rådet, 2018 & 2019) and the most recent background report from the Environmental Protection Agency (Naturvårdsverket, 2019) informing the government's ongoing work of establishing a climate policy strategy. While steeper pathways with annual emission reductions are included in several reports by the Environmental Protection Agency (Naturvårdsverket, 2018 & 2019), and mentioned as an option in the latest report from the Climate Policy Council (Klimatpolitiska rådet, 2019), linear emissions pathways still dominate advice to government and are hence those assumed here.

For aviation, the Swedish Transport Administration's headline growth scenario assumes an 82% increase in passengers by 2040 (cf. 2015) (Trafikverket, 2016). Cumulative aviation emissions up until 2050 are approximated using an assumed annual sector growth rate of 2.4% and a fuel efficiency increase of 2% per annum in line with the International Aviation Transport Association's (IATA) target of 50% reductions in emissions by 2050 (cf. 2005). If Larsson et al.'s (2019) method is followed and emissions from domestic flights subtracted (based on data from the Swedish Environmental Protection Agency), total CO<sub>2</sub> emissions from Swedish residents' international air travel can be estimated to be 4,9 Mt CO<sub>2</sub> in 2017, growing to 5,8 Mt CO<sub>2</sub> in 2030. This is around 75% and 100% higher than CO<sub>2</sub> emissions from a bunker fuel basis that is included in the pathway in this paper, for 2017 and 2030 respectively.

For shipping, a linear mitigation path is assumed from 2020, reaching 50% reduction by 2050 (cf. 2008) in line with the International Maritime Organisation's (IMO) target. The Swedish Transport Administration's headline scenario suggests a 90% growth in the sector between 2012 and 2040. The Swedish Shipowners Association has adopted a goal of carbon neutrality by 2050 (Svensk Sjöfart, 2015), with recent discussions about moving it to 2045. However, with the prognosed sector growth above, extrapolated to 2050, this would require an increased carbon efficiency of 8% per annum or more. The IMO target combined with the same sector growth, implies an increased carbon efficiency of around 4% per annum in 2020, reaching 6% per annum in 2050, which are considered to be more likely rates of delivery.

The cement pathway is in line with ongoing multi-stakeholder discussions on mitigating industrial process-emissions in line with the Swedish net-zero 2045 target. (Svemin, 2018, Figure 8). For cement, this is assumed to be mainly through the development and deployment of carbon capture and storage (CCS) and carbon capture and use (CCU).

## References

- Klimatpolitiska rådet. (2018). Det klimatpolitiska ramverket rapport 2018. Retrieved from: <https://www.klimatpolitiskaradet.se/arsrapport/>
- Klimatpolitiska rådet. (2019). Klimatpolitiska rådets rapport 2019. Retrieved from: <https://www.klimatpolitiskaradet.se/wp-content/uploads/2019/04/kprrapport190426.pdf>
- Larsson, J., Elofsson, A., Sterner, T. & Åkerman, J. (2019). International and national climate policies for aviation: A review. *Climate Policy*, 19(6), 787-799. [doi:10.1080/14693062.2018.1562871](https://doi.org/10.1080/14693062.2018.1562871)
- Naturvårdsverket. (2018). Förslag till en långsiktig klimatstrategi för Sverige i enlighet med Parisavtalet: Redovisning av Regeringsuppdrag (M2017/02742/KI). Retrieved from: <http://www.naturvardsverket.se/upload/miljoarbete-i-samhallet/miljoarbete-i-sverige/regeringsuppdrag/2018/redovisn-ru-Langsiktig-klimatstrategi-forslag-Sverige-Parisavtalet-20180427.pdf>
- Naturvårdsverket. (2019). Underlag till regeringens klimatpolitiska handlingsplan: Redovisning av Naturvårdsverkets regeringsuppdrag. Naturvårdsverket rapport 6879. Retrieved from: <https://www.naturvardsverket.se/Documents/publikationer6400/978-91-620-6879-0.pdf?pid=24382>
- Svemin. (2018). Färdplan för en konkurrenskraftig och fossilfri gruv och mineralnäring: Delrapport April 2018. Retrieved from: [http://fossilfritt-sverige.se/wp-content/uploads/2018/04/ffs\\_gruv-och-mineralnaringen.pdf](http://fossilfritt-sverige.se/wp-content/uploads/2018/04/ffs_gruv-och-mineralnaringen.pdf)
- Svensk Sjöfart. (2015). Klimatfärdplan: Underlag för utredningen Klimatfärdplan 2050. Retrieved from: [http://www.sweship.se/wp-content/uploads/2015/08/Klimatf%C3%A4rdplan\\_Svensk-sjofart\\_Klimat\\_web.pdf](http://www.sweship.se/wp-content/uploads/2015/08/Klimatf%C3%A4rdplan_Svensk-sjofart_Klimat_web.pdf)
- Trafikverket. (2016). Rapport: Resandeprognos för flygtrafiken 2040. Trafikverkets Basprognoser 2016-04-01. Retrieved from: [https://www.trafikverket.se/contentassets/7e1063efbcfd4b34a4591b0d4e00f855/resandeprognos\\_for\\_flygtrafiken\\_2040\\_-\\_trafikverkets\\_basprognoser\\_2016-0....pdf](https://www.trafikverket.se/contentassets/7e1063efbcfd4b34a4591b0d4e00f855/resandeprognos_for_flygtrafiken_2040_-_trafikverkets_basprognoser_2016-0....pdf)
